# Supplementary material for: Post-registration experience of nivolumab in advanced hepatocellular carcinoma: an international study
Source: PubMed Central journal article supplement — J Immunother Cancer. 2020 Aug 31;8(2):e001033. doi: 10.1136/jitc-2020-001033 (PMC7462152; doi:10.1136/jitc-2020-001033), 2020-08-31
Supplement: jitc-2020-001033supp001.pdf [file jitc-2020-001033supp001.pdf]

**Supplementary Table 1. Uni- and multivariate analysis of progression-free survival in patients with HCC treated with nivolumab.**

| Variable                                                              | Univariable HR (95% CI) | p value           | Multivariable HR (95% CI) | p value           |
|-----------------------------------------------------------------------|-------------------------|-------------------|---------------------------|-------------------|
| Baseline AFP, >400/<400 IU/mL                                         | 1.30 (0.85-1.99)        | 0.22              |                           |                   |
| BCLC Stage, C+D/A+B                                                   | 2.82 (1.46-5.44)        | <b>0.002*</b>     | 2.58 (1.33-5.01)          | <b>0.005*</b>     |
| Child-Pugh, B/A                                                       | 1.04 (0.66-1.62)        | 0.86              |                           |                   |
| Cirrhosis, present/absent                                             | 1.01 (0.66-1.54)        | 0.97              |                           |                   |
| Concomitant steroid use, present/absent                               | 0.95 (0.65-1.39)        | 0.95              |                           |                   |
| Objective response CR+PR/SD+PD                                        | 0.26 (0.18-0.39)        | <b>&lt;0.001*</b> | 0.20 (0.11-0.37)          | <b>&lt;0.001*</b> |
| ECOG-PS, 0/1-3                                                        | 0.60 (0.25-1.44)        | 0.25              |                           |                   |
| Extrahepatic spread, present/absent                                   | 1.04 (0.56-1.93)        | 0.89              |                           |                   |
| Immunotherapy line, 1 <sup>st</sup> /2 <sup>nd</sup> -4 <sup>th</sup> | 0.60 (0.39-0.93)        | <b>0.02*</b>      | 0.60 (0.38-0.93)          | <b>0.023</b>      |
| PVT, present/absent                                                   | 1.09 (0.58-2.03)        | 0.80              |                           |                   |

**Supplementary Table 2. Baseline patient characteristics stratified according to line of therapy.**

|                                                    |     | <b>1L (%)</b> | <b>&gt;1L (%)</b> | <b><math>\chi^2</math> test p value</b> |
|----------------------------------------------------|-----|---------------|-------------------|-----------------------------------------|
| <b>AFP &gt;400 iU/mL</b><br>(n=225)                |     | 36/84 (42.9)  | 57/141 (40.4)     | 0.72                                    |
| <b>BCLC stage</b><br>(n=233)                       | A-B | 23/85 (27.1)  | 31/148 (20.9)     | 0.29                                    |
|                                                    | C-D | 62/85 (72.9)  | 117/148 (79.1)    |                                         |
| <b>Cirrhosis</b> (n=233)                           |     | 65/85 (76.5)  | 111/148 (75.0)    | 0.80                                    |
| <b>Concomitant steroid use</b><br>(n=233)          |     | 30/85 (35.3)  | 38/148 (25.7)     | 0.12                                    |
| <b>CP class</b><br>(n=233)                         | A   | 54/85 (63.5)  | 104/148 (70.3)    | 0.29                                    |
|                                                    | B   | 31/85 (36.5)  | 44/148 (29.7)     |                                         |
| <b>ECOG PS</b><br>(n=157)                          | 0   | 4/27 (14.8)   | 23/112 (20.5)     | 0.29                                    |
|                                                    | 1-3 | 23/27 (85.2)  | 89/112 (79.5)     |                                         |
| <b>Extrahepatic spread</b><br>(n=157)              |     | 10/27 (37.0)  | 56/113 (49.6)     | 0.24                                    |
| <b>Objective response</b> (n=233)                  |     | 21/85 (24.7)  | 28/148 (18.9)     | 0.30                                    |
| <b>Portal vein thrombosis</b><br>(n=157)           |     | 8/27 (29.6)   | 51/113 (34.5)     | 0.14                                    |
| <b>Post-ICI active anti-cancer therapy</b> (n=140) |     | 9/27 (33.3)   | 33/113 (29.2)     | 0.67                                    |
